# Supplementary material for: Soluble Axl is an accurate biomarker of cirrhosis and hepatocellular carcinoma development: results from a large scale multicenter analysis
Source: PubMed Central journal article supplement (PMC5542263; doi:10.18632/oncotarget.17598), 2017-05-03
Supplement: oncotarget-08-46234-s001.pdf [file oncotarget-08-46234-s001.pdf]

# Soluble Axl is an accurate biomarker of cirrhosis and hepatocellular carcinoma development: results from a large scale multicenter analysis

## SUPPLEMENTARY MATERIALS

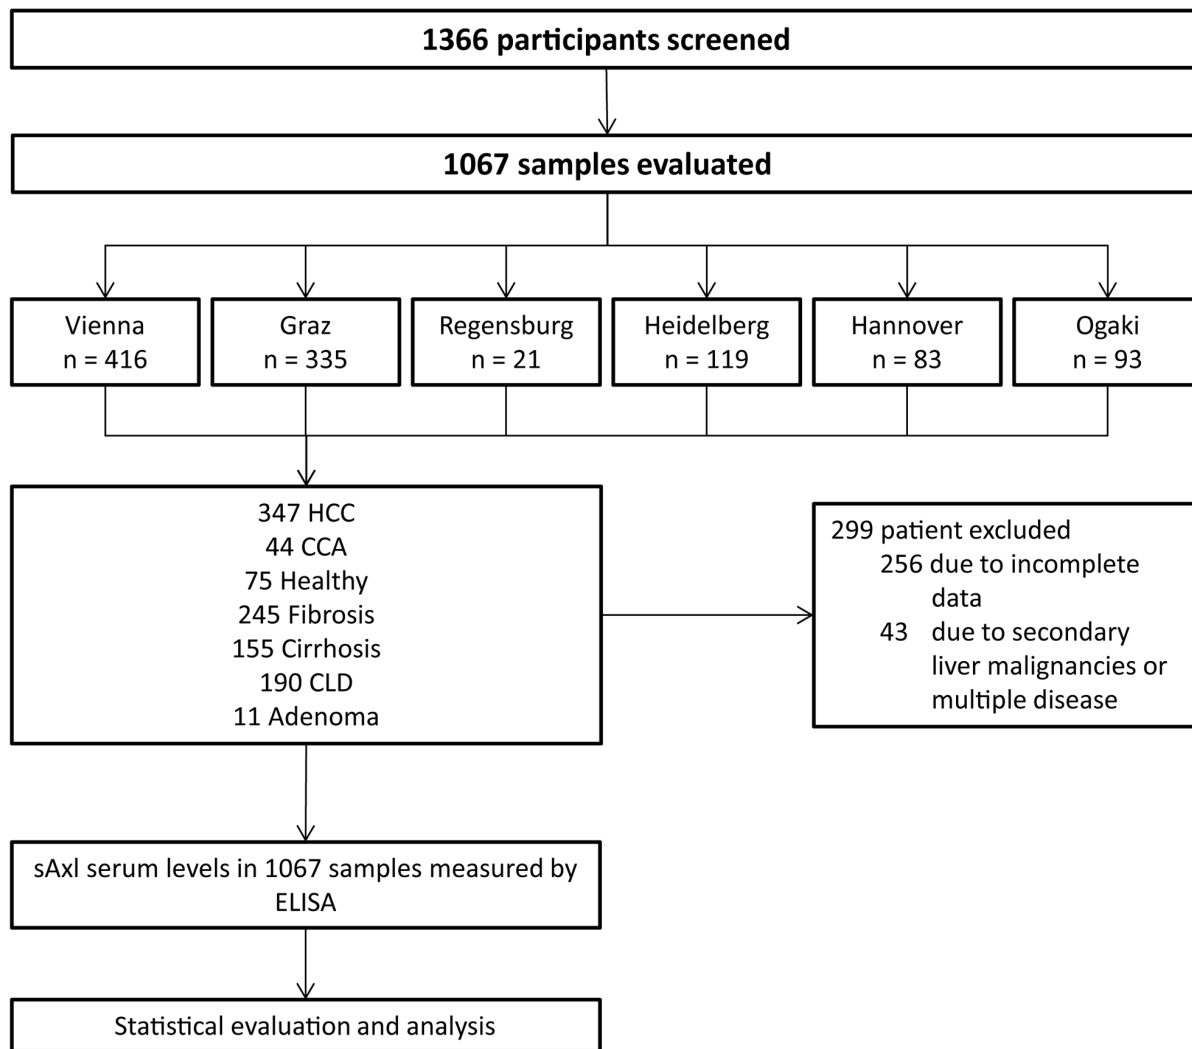

**Supplementary Figure 1: Study design.** ELISA: enzyme-linked immunosorbent assay; HCC: hepatocellular carcinoma; CCA: cholangiocarcinoma; CLD: chronic liver disease.

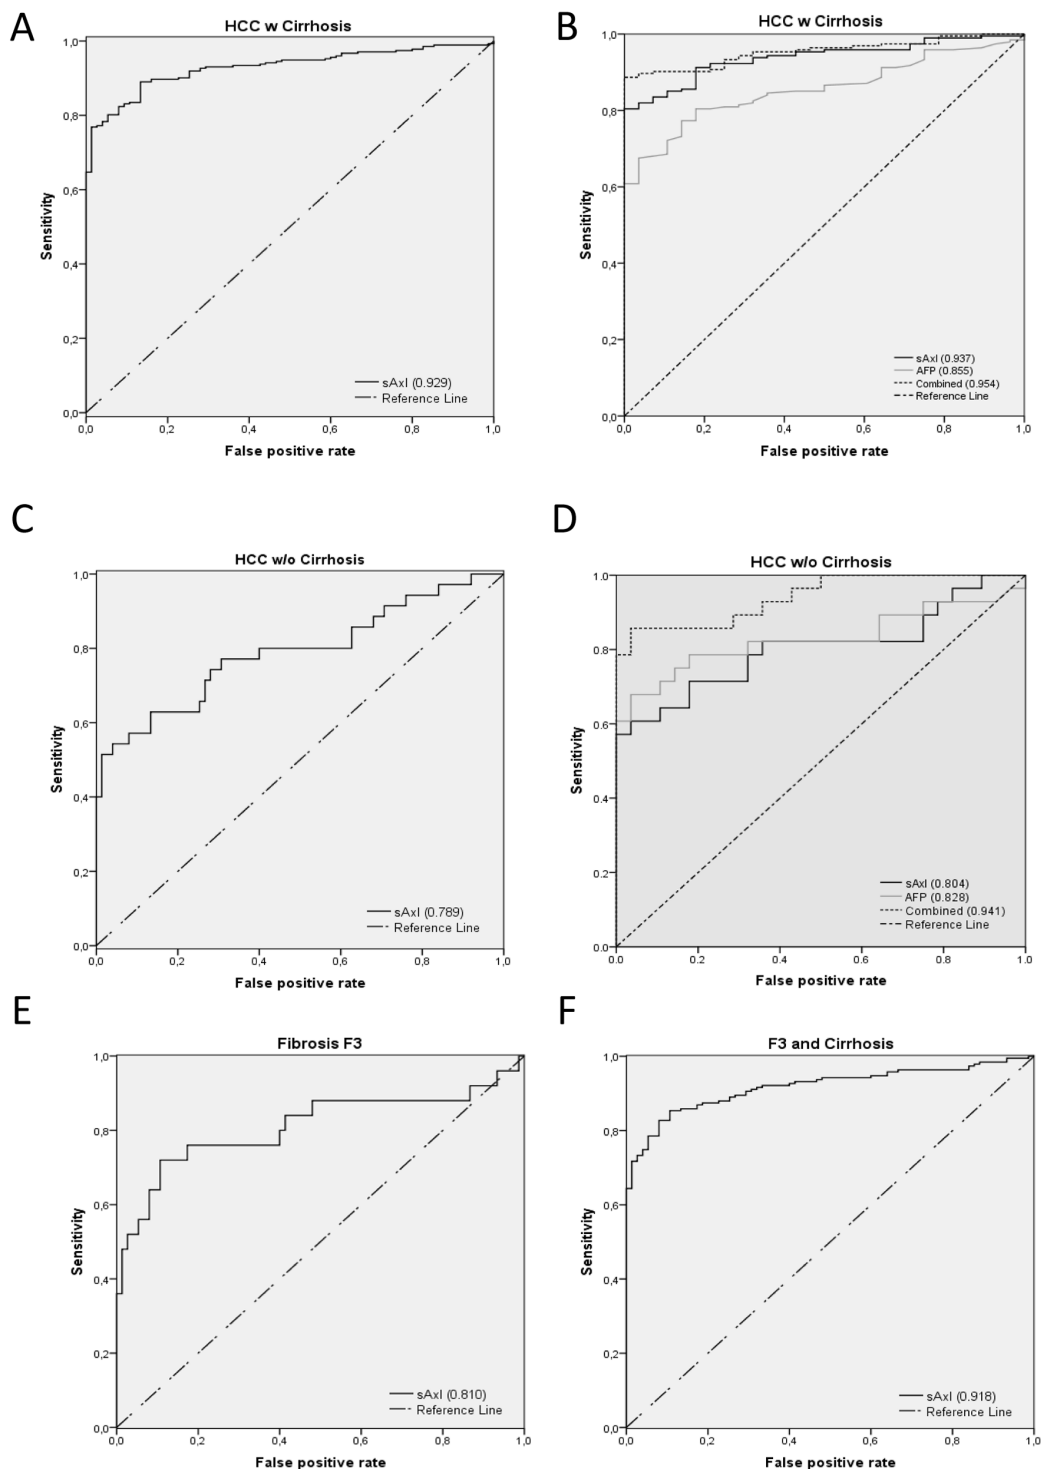

**Supplementary Figure 2: Detection of HCC without cirrhosis and advanced fibrosis by sAxI.** (A) ROC curve of sAxI in healthy controls ( $n = 75$ ) versus HCC patients with cirrhosis ( $n = 272$ ). (B) ROC curve of sAxI, AFP and a combination of both in healthy controls ( $n = 28$ ) versus HCC patients with cirrhosis ( $n = 194$ ). (C) ROC curve of sAxI in healthy controls ( $n = 75$ ) versus HCC patients without cirrhosis ( $n = 35$ ). (D) ROC curve of sAxI, AFP and a combination of both in healthy controls ( $n = 28$ ) versus HCC patients without cirrhosis ( $n = 28$ ). (E) ROC curve of sAxI in healthy controls ( $n = 75$ ) versus advanced fibrosis patients (F3:  $n = 36$ ). (F) ROC curve of sAxI in healthy controls ( $n = 75$ ) versus a combination of advanced fibrosis and cirrhosis patients ( $n = 191$ ). Numbers in parentheses represent area under the curve.

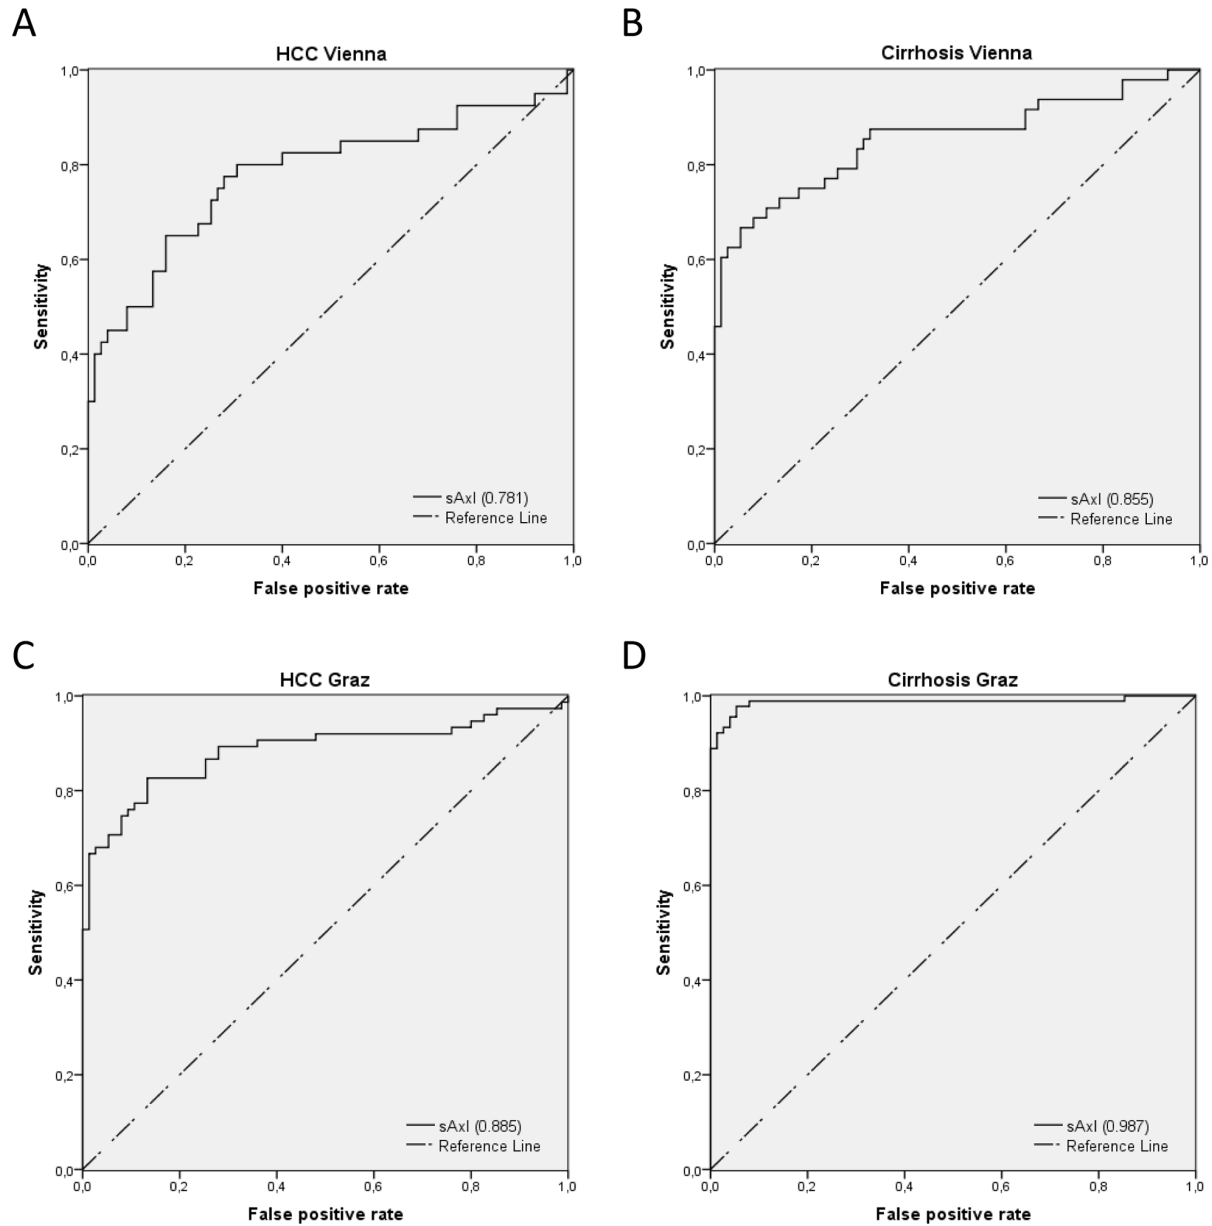

**Supplementary Figure 3: Center-specific detection of HCC and cirrhosis by sAxI.** (A) ROC curve of sAxI in healthy controls ( $n = 75$ ) versus HCC patients (Vienna:  $n = 40$ ). (B) ROC curve of sAxI in healthy controls ( $n = 75$ ) versus cirrhosis patients (F4, cirrhosis w/o HCC; Vienna:  $n = 48$ ). (C) ROC curve of sAxI in healthy controls ( $n = 75$ ) versus HCC patients (Graz:  $n = 75$ ). (D) ROC curve of sAxI in healthy controls ( $n = 75$ ) versus cirrhosis patients (F4, cirrhosis w/o HCC; Graz:  $n = 90$ ). Numbers in parentheses represent area under the curve.

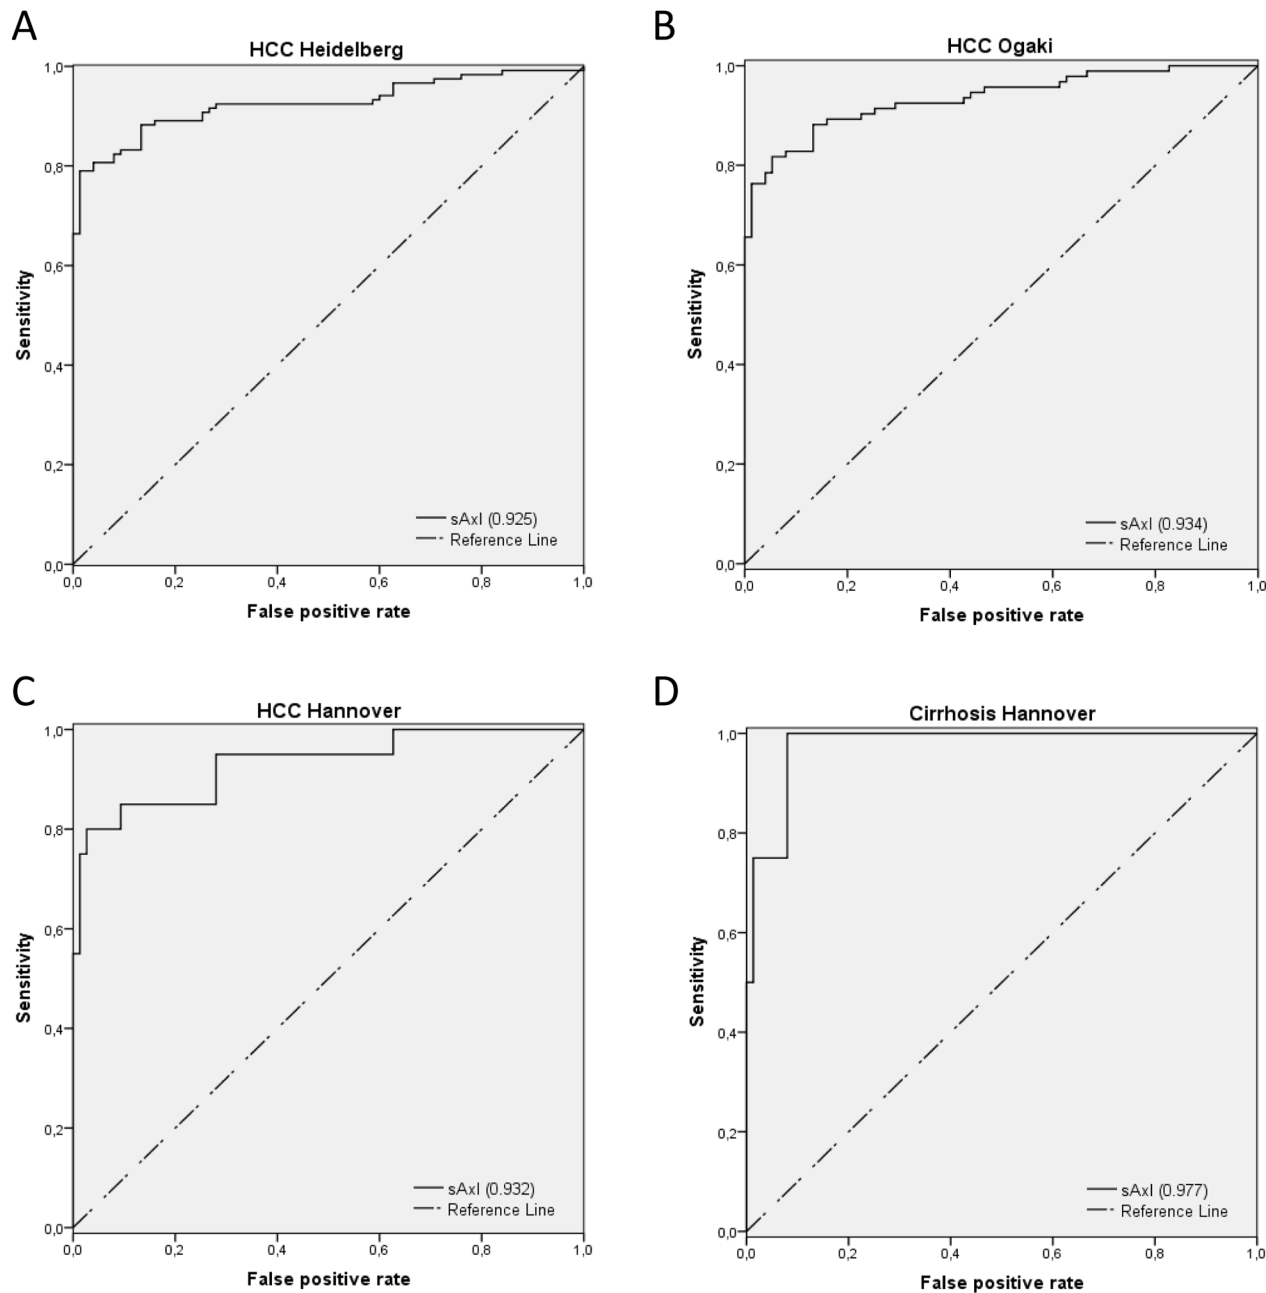

**Supplementary Figure 4: Center-specific detection of HCC and cirrhosis by sAxI.** (A) ROC curve of sAxI in healthy controls ( $n = 75$ ) versus HCC patients (Heidelberg:  $n = 119$ ). (B) ROC curve of sAxI in healthy controls ( $n = 75$ ) versus HCC patients (Ogaki:  $n = 93$ ). (C) ROC curve of sAxI in healthy controls ( $n = 75$ ) versus HCC patients (Hannover:  $n = 20$ ). (D) ROC curve of sAxI in healthy controls ( $n = 75$ ) versus cirrhosis patients (F4, cirrhosis w/o HCC; Hannover:  $n = 4$ ). Numbers in parentheses represent area under the curve.

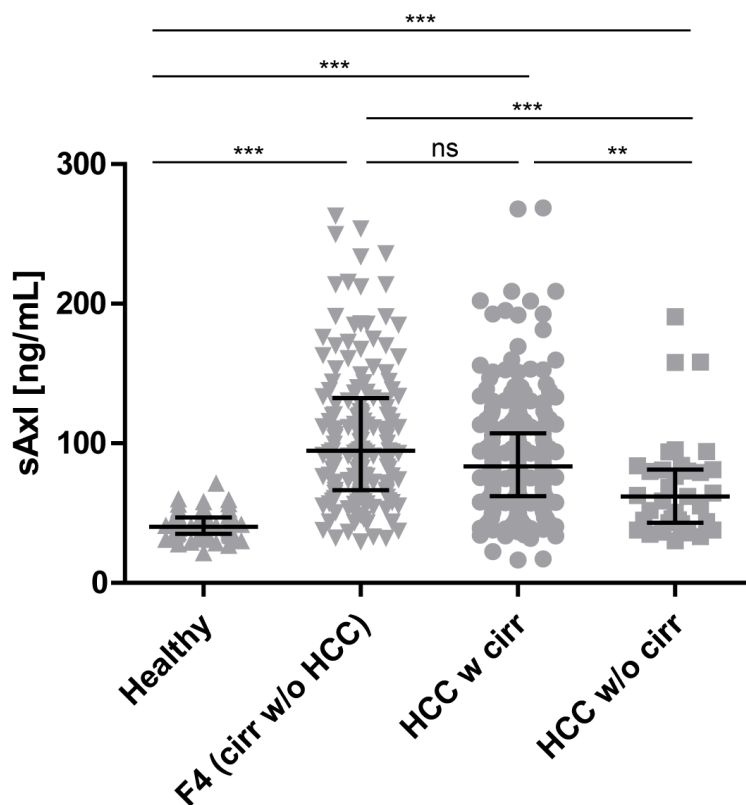

**Supplementary Figure 5: sAxI levels in HCC patients with and without cirrhosis compared to cirrhosis and healthy control.** Analysis of sAxI serum concentrations in healthy controls ( $n = 75$ ), cirrhosis patients (F4, cirrhosis w/o HCC;  $n = 155$ ), HCC patients with cirrhosis ( $n = 272$ ) and HCC patients without cirrhosis ( $n = 35$ ). Serum samples were diluted with LowCross-buffer® (Candor, Germany) 1:200 and analyzed for sAxI levels by ELISA. Horizontal bars indicate median levels with interquartile ranges. Statistical significances of the differences between groups were evaluated with Mann-Whitney U test. Ns: not significant. \*\* =  $p \leq 0.01$ , \*\*\* =  $p \leq 0.001$ .

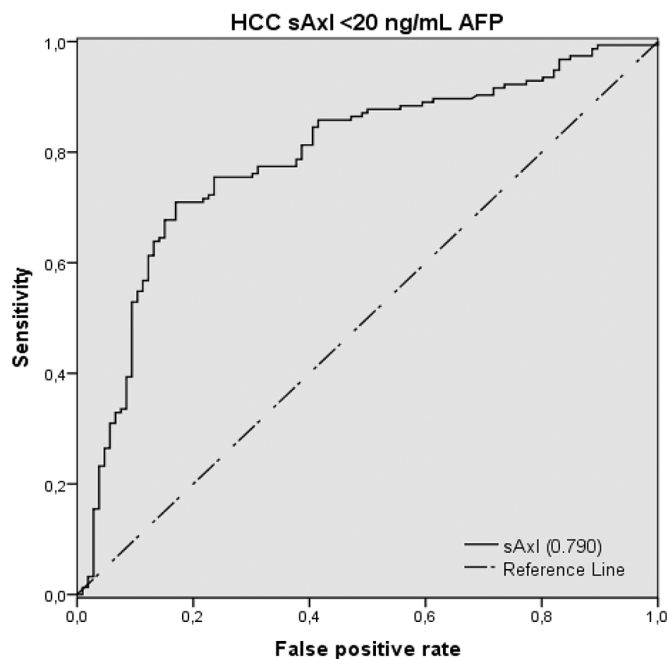

**Supplementary Figure 6: Detection of AFP-negative HCC and AFP-negative fibrosis/cirrhosis (F1 - F4) by sAxI.** ROC curve of sAxI in AFP-negative (<20 ng/mL) HCC patients ( $n = 155$ ) versus AFP-negative fibrosis and cirrhosis patients ( $n = 106$ ). The number in parentheses represents the area under the curve AUC (0.95% CI): 0.709 (0.733 – 0.847) with a detection sensitivity of 71.0% and a specificity of 83.0% at a Youden's index of 0.54 and a cut-off of 61.36 ng/mL serum concentration. PPV and NPV calculations resulted in 85.2% and 66.2%, respectively. Due to missing space and to avoid further complexity, these data are not shown in Table 3. Statistical significance between the groups was evaluated by Mann-Whitney U test revealing high differential diagnostic power with a  $p$  value of <0.0001 (data not shown). Additionally, verified by direct sAxI median comparison of the two groups: AFP negative fibrosis/cirrhosis (80.44 ng/mL) and AFP negative HCC (46.37 ng/mL).
